# Supplementary material for: H3K4 demethylase activities repress proliferative and postmitotic aging
Source: PubMed Central journal article supplement (PMC4020274; doi:10.1111/acel.12166), 2013-11-19
Supplement: NIHMS532804-supplement-Supp_Figure_S1-S4.pdf [file NIHMS532804-supplement-Supp_Figure_S1-S4.pdf]

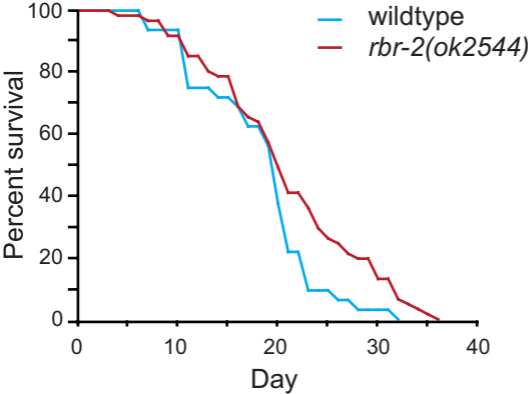

**Supplementary Fig. 1**

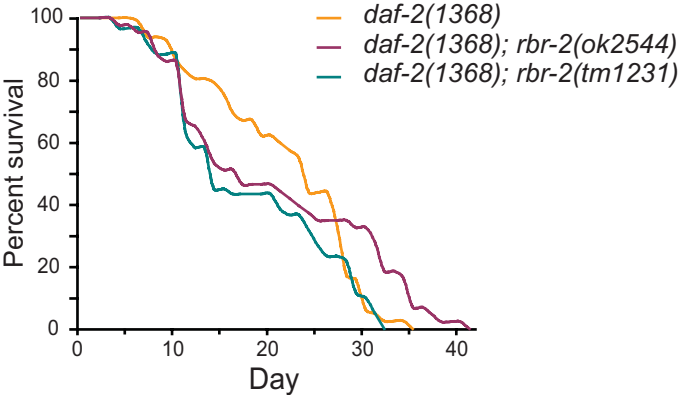

**Supplementary Fig. 2**

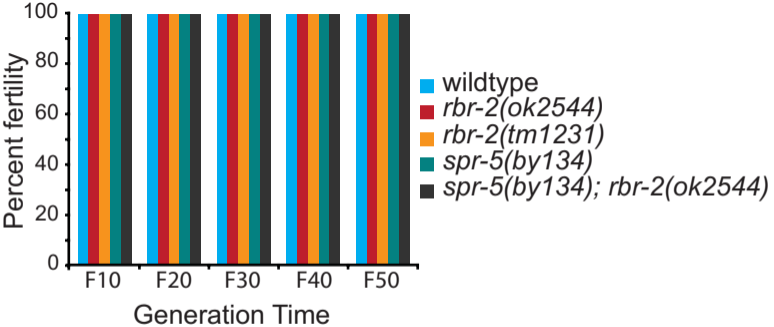

**Supplementary Fig. 3**

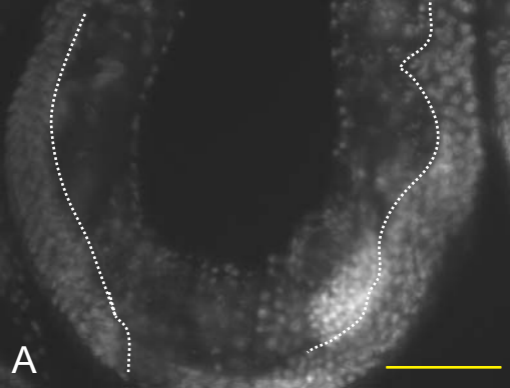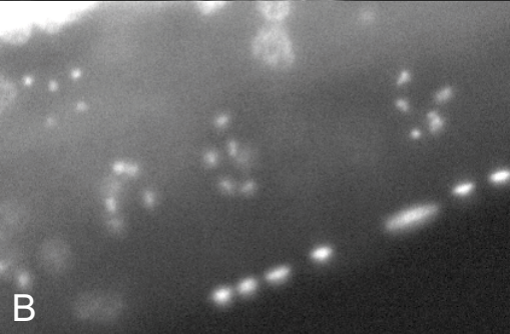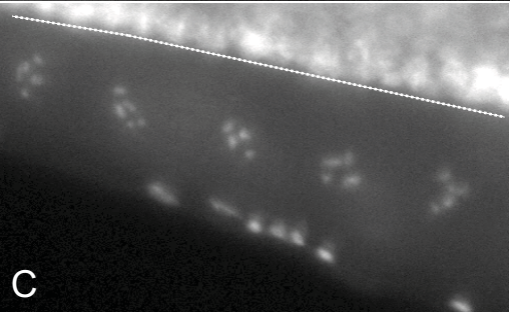

**Supplementary Fig. 4**
